# Supplementary material for: Turmeronol A and turmeronol B fromCurcuma longaprevent inflammatory mediator production by lipopolysaccharide-stimulated RAW264.7 macrophages, partiallyviareduced NF-κB signaling
Source: Royal Society of Chemistry journal article supplement (doi:10.1039/c9fo00336c), 2019-01-01
Supplement: c9fo00336c1.pdf [file c9fo00336c1.pdf]

## Supplemental tables

**S1 Table.** Real time PCR primers for analysis.

| Gene          | Direction          | Primer sequence           |
|---------------|--------------------|---------------------------|
| COX-2         | Forward (5' -> 3') | CTGGAACATGGACTCACTCAGTTTG |
|               | Reverse (5' -> 3') | AGGCCTTTGCCACTGCTTGTA     |
| GAPDH         | Forward (5' -> 3') | TGTGTCCGTCGTGGATCTGA      |
|               | Reverse (5' -> 3') | TTGCTGTTGAAGTCGCAGGAG     |
| IL-1 $\beta$  | Forward (5' -> 3') | TCTTTGAAGTTGACGGACCC      |
|               | Reverse (5' -> 3') | TGAGTGATACTGCCTGCCTG      |
| IL-6          | Forward (5' -> 3') | TCTATACCACTTCACAAGTCGGA   |
|               | Reverse (5' -> 3') | GAATTGCCATTGCACAACCTCTTT  |
| iNOS          | Forward (5' -> 3') | GTTCTCAGCCCAACAATACAAGA   |
|               | Reverse (5' -> 3') | GTGGACGGGTCGATGTCAC       |
| TNF- $\alpha$ | Forward (5' -> 3') | CCTGTAGCCCACGTCGTAG       |
|               | Reverse (5' -> 3') | GGGAGTAGACAAGGTACAACCC    |
